# Supplementary material
Source: PubMed Central journal article supplement (PMC4352321)

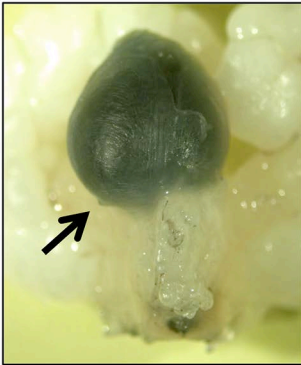

**Bladder**

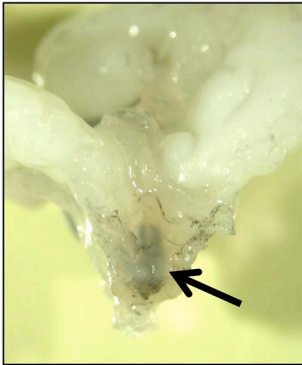

**Proximal  
Urethra**

Supplement: NIHMS662569-supplement-Supplementary_data.pdf [file NIHMS662569-supplement-Supplementary_data.pdf]

## Killed Bacteria

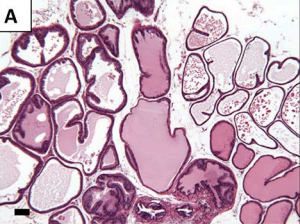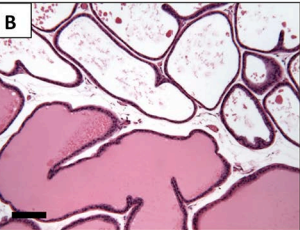

## Culture Supernatant

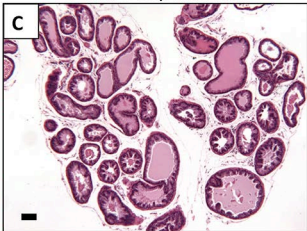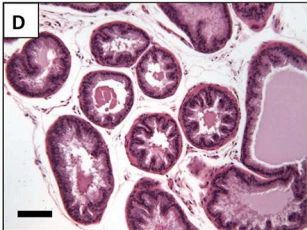

Supplement: NIHMS662569-supplement-Supplementary_data2.pdf [file NIHMS662569-supplement-Supplementary_data2.pdf]

**CP1 6 months**

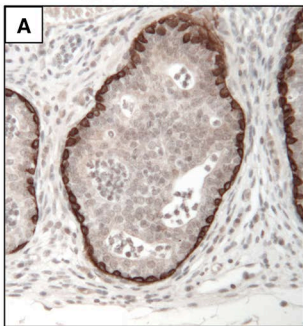

**CP1 1 year**

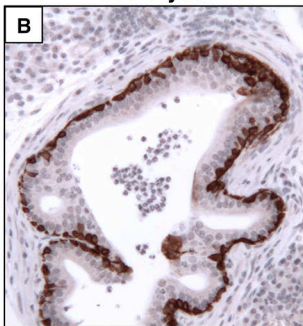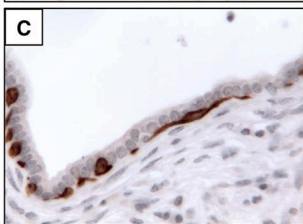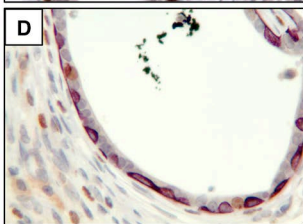

Supplement: NIHMS662569-supplement-Supplementary_data3.pdf [file NIHMS662569-supplement-Supplementary_data3.pdf]

**Control****CP1 8 weeks****CP1 6 months****CP1 1 year****Trichrome**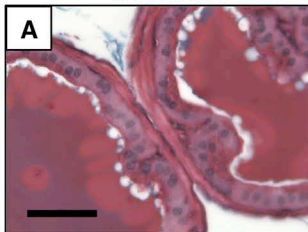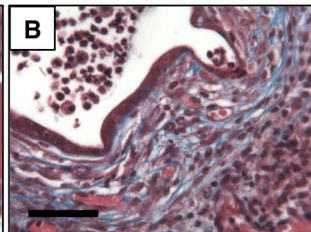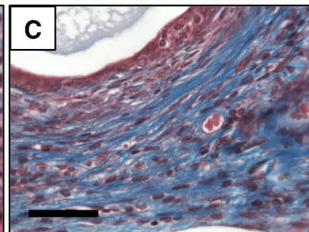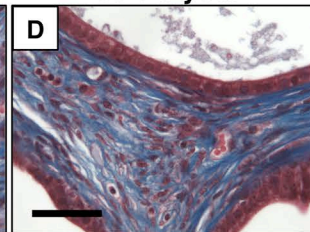**Vimentin**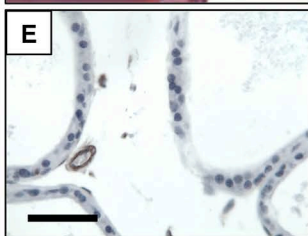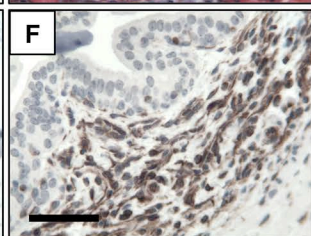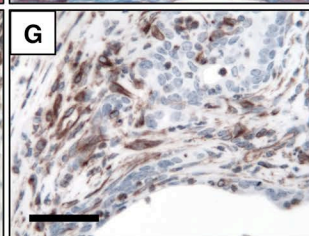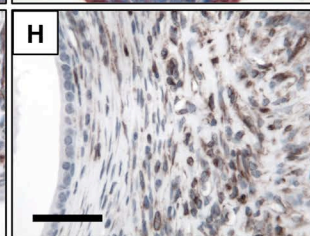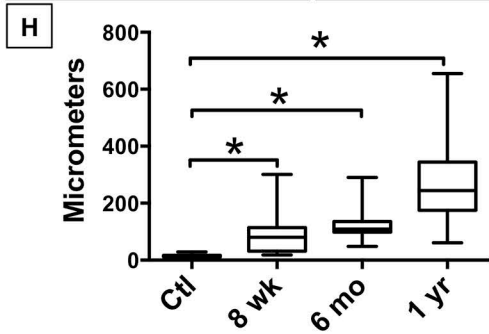

Supplement: NIHMS662569-supplement-Supplementary_data4.pdf [file NIHMS662569-supplement-Supplementary_data4.pdf]
